# Supplementary material for: Mechanistic insights into the electron attachment process to guanosine in the presence of arginine
Source: Royal Society of Chemistry journal article supplement (doi:10.1039/d4cp02558j), 2024-01-01
Supplement: d4cp02558j1.pdf [file d4cp02558j1.pdf]

## Supporting Information

### **Mechanistic insight into the electron attachment process to guanosine in the presence of arginine**

Manash Pratim Sarmah and Manabendra Sarma\*

Department of Chemistry, Indian Institute of Technology Guwahati

Assam-781039, India

\*Corresponding Author, E-mail: [msarma@iitg.ac.in](mailto:msarma@iitg.ac.in)

Phone: +91 361 258 2318

## Table of Contents

| <b>Sl. No.</b> | <b>Document Lists</b>                                                                                                                                                                                                                                                                                                                                         | <b>Section</b> | <b>Page No.</b> |
|----------------|---------------------------------------------------------------------------------------------------------------------------------------------------------------------------------------------------------------------------------------------------------------------------------------------------------------------------------------------------------------|----------------|-----------------|
| <b>1</b>       | Figure S1: Root mean square deviation (RMSD) (nm) vs. simulation time for guanosine, and (b) root mean square fluctuation (RMSF) (nm) vs. atom index for guanosine and arginine.                                                                                                                                                                              | Figure S1      | 4               |
| <b>1</b>       | RMSD (nm) vs. Time (ns) for guanosine.                                                                                                                                                                                                                                                                                                                        | Figure S2      | 5               |
| <b>2</b>       | RMSF (nm) vs. Number of atoms of guanosine.                                                                                                                                                                                                                                                                                                                   | Figure S3      | 5               |
| <b>3</b>       | The frames taken from the MD simulations (a) arg-guanosine after 14 ns having one intermolecular H-bonds (1-H=O1-H1), (b) arg-guanosine after 17 ns having one intermolecular H-bonds (1-H=N3-H1), (c) arg-guanosine after 52 ns having two intermolecular H-bonds (2-H=N3-H2, O1-H1), and (d) guanosine after 100 ns (excluded surrounding water molecules). | Figure S4      | 6               |
| <b>4</b>       | The number of hydrogen bonds (H-bonds) between arginine and guanosine in the MD simulations is up to 60 ns.                                                                                                                                                                                                                                                   | Figure S5      | 7               |
| <b>5</b>       | Singly occupied molecular orbitals (SOMOs) of (a) arg-guanosine (1-H=O1-H1) and (b) arg-guanosine (1-H=N3-H1) using MP2//B3LYP/6-311++G(d,p) level of theory.                                                                                                                                                                                                 | Figure S6      | 8               |

|           |                                                                                                                                                                                      |           |    |
|-----------|--------------------------------------------------------------------------------------------------------------------------------------------------------------------------------------|-----------|----|
| <b>6</b>  | The VAE and VDE values for the molecules were computed using the MP2/6-311++G(d,p) level of theory. (All values are in eV).                                                          | Table S1  | 9  |
| <b>7</b>  | Charge distribution on different fragments of the molecules [from natural population analysis (NPA)] using B3LYP/6-311++G(d,p) level of theory.                                      | Table S2  | 10 |
| <b>8</b>  | Vertical detachment energy (eV) with every 50 fs of interval for arg-guanosine (2H = N3-H2, O1-H1), guanosine using MP2/6-311++G(d,p)//B3LYP/6-31G+(d) level of theory.              | Table S3  | 11 |
| <b>9</b>  | Vertical detachment energy (eV) with every 50 fs of interval for arg-guanosine (2H = N3-H2, O1-H1), guanosine using B3LYP/6-311++G(d,p)//B3LYP/6-31G+(d) level of theory.            | Table S4  | 12 |
| <b>10</b> | Figure S6: Vertical detachment energy (eV) vs. time (fs) (a) for arg-guanosine (2H = N3-H2, O1-H1), (b) guanosine using B3LYP/6-311++G(d,p)//B3LYP/6-31G+(d) level of theory.        | Figure S7 | 13 |
| <b>11</b> | The intrinsic reaction coordinate (IRC) curves (a) arg-guanosine and (b) Guanosine using B3LYP/6-311++G(d,p) level of theory for high layer and UFF for low layer surrounding water. | Figure S8 | 14 |

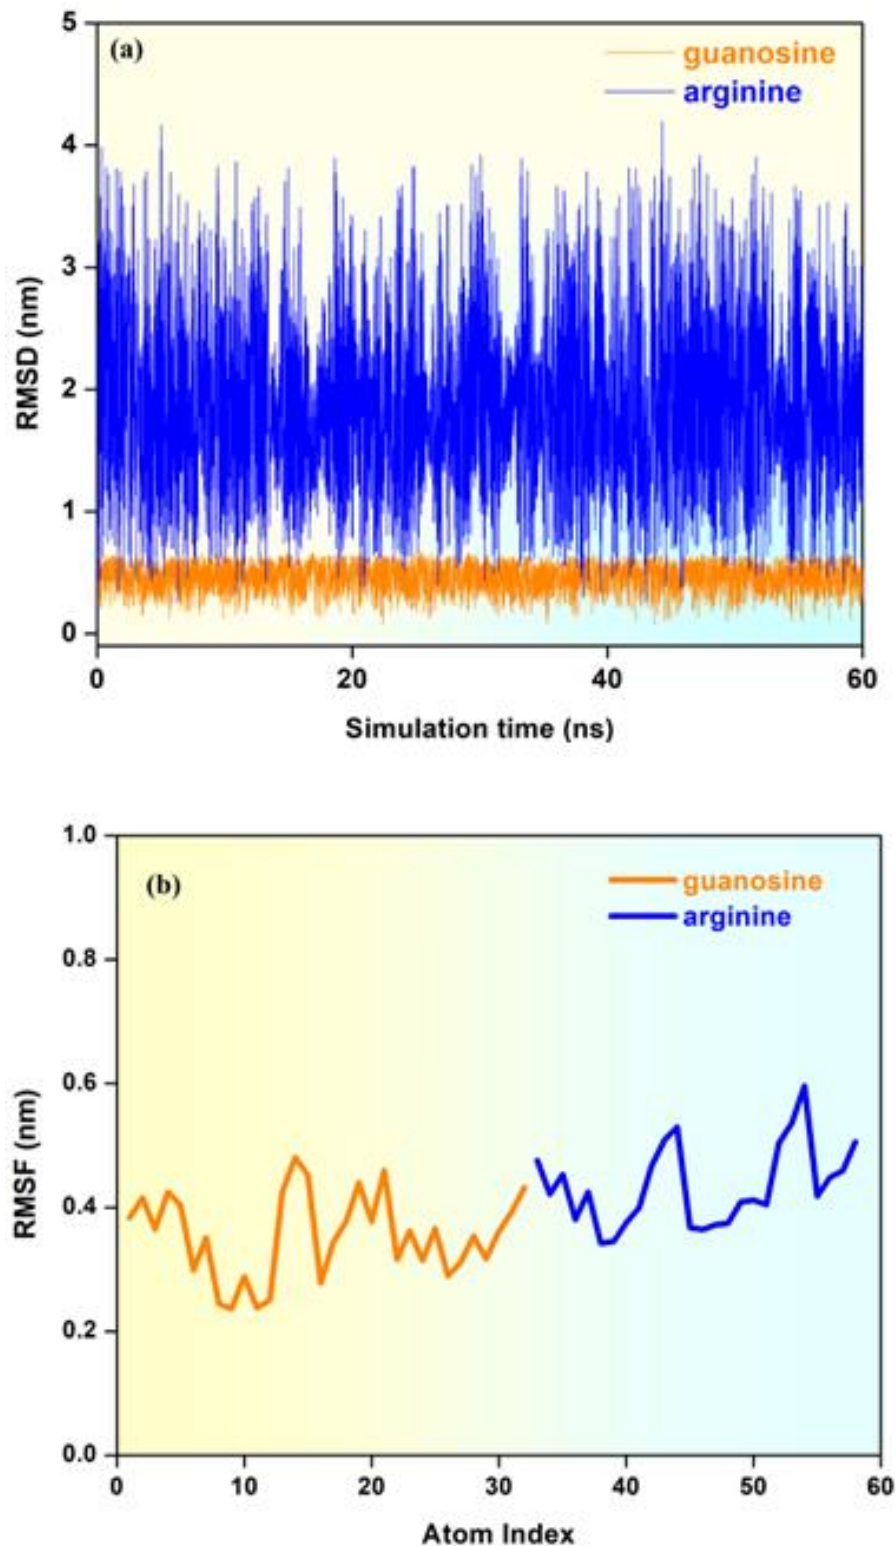

Figure S1: Root mean square deviation (RMSD) (nm) vs. simulation time for guanosine, and (b) root mean square fluctuation (RMSF) (nm) vs. atom index for guanosine and arginine.

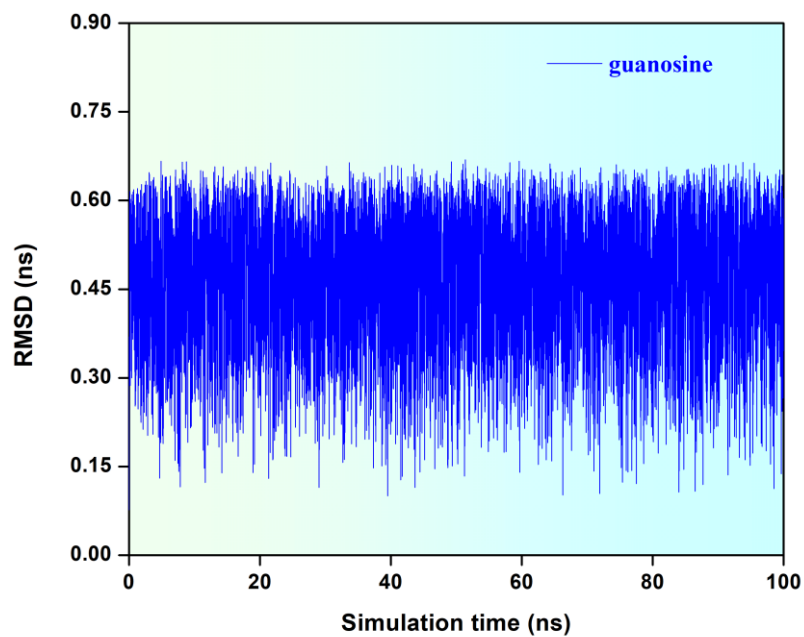

Figure S2: RMSD (nm) vs. Time (ns) for guanosine.

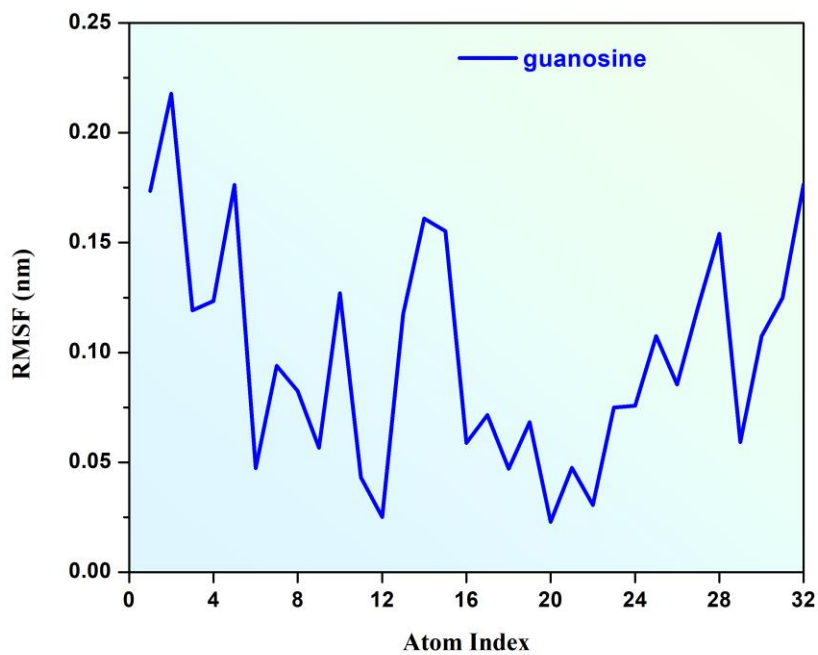

Figure S3: RMSF (nm) vs. Number of atoms of guanosine.

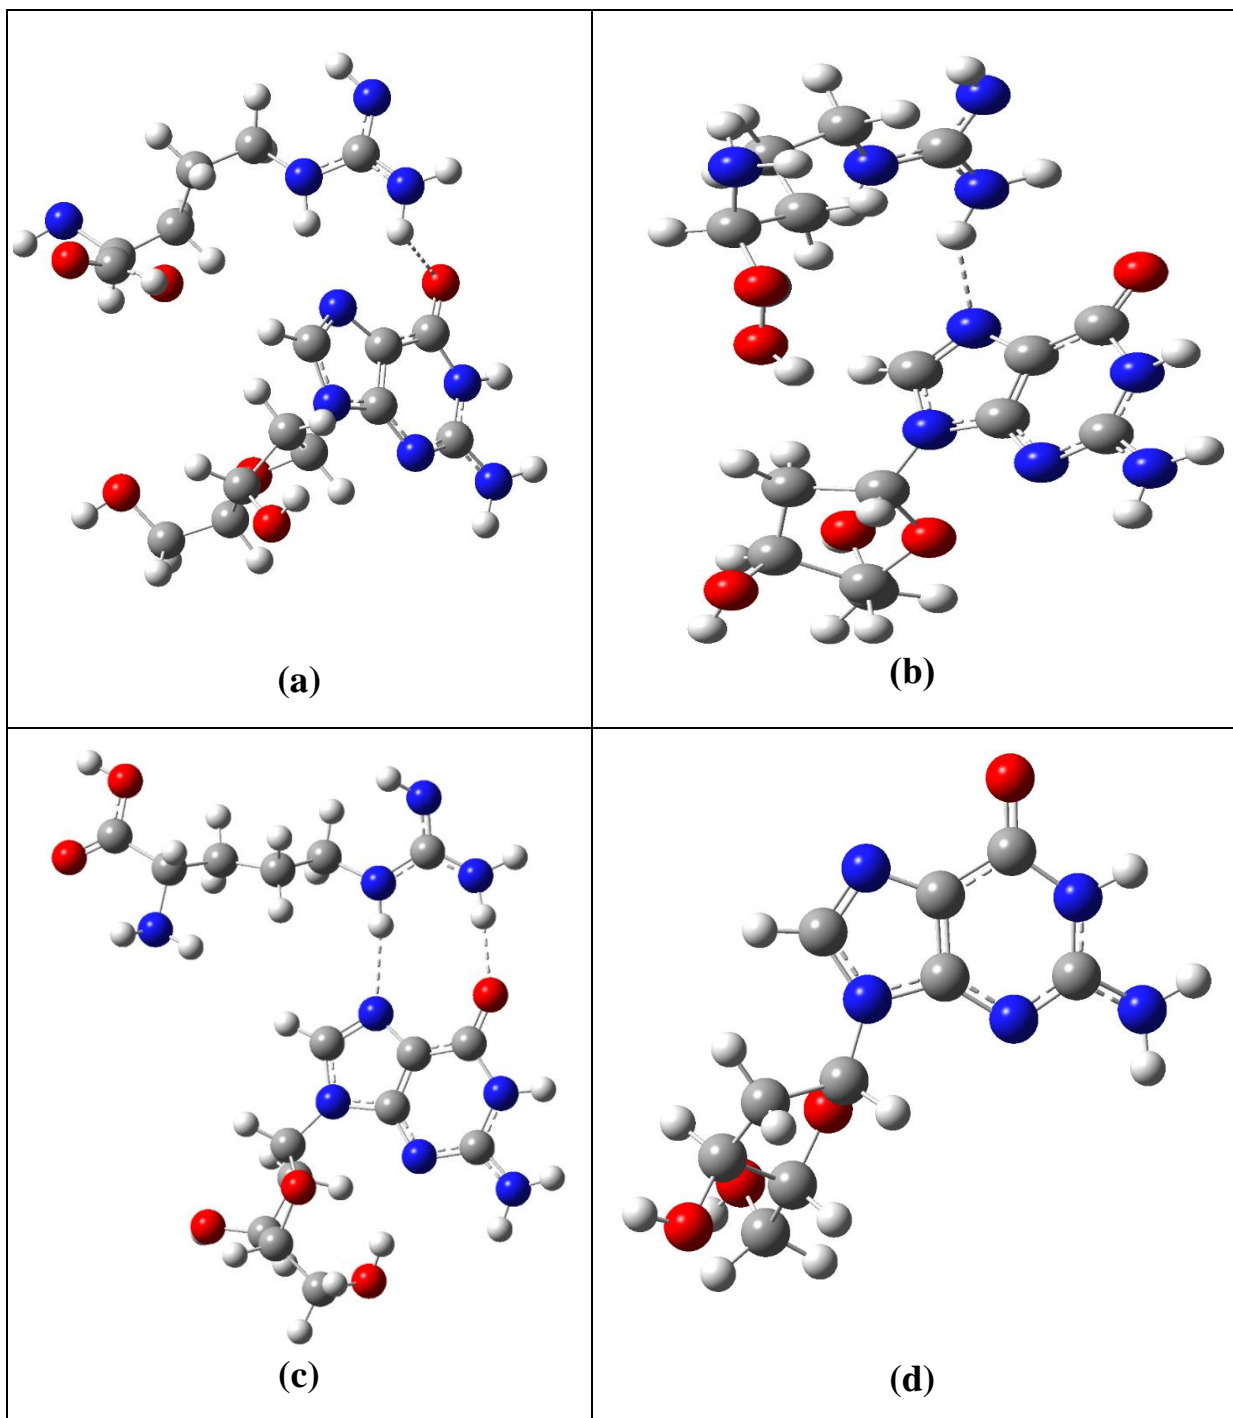

Figure S4: The frames taken from the MD simulations (a) arg-guanosine after 14 ns having one intermolecular H-bonds (1-H=O1-H1), (b) arg-guanosine after 17 ns having one intermolecular H-bonds (1-H=N3-H1), (c) arg-guanosine after 52 ns having two intermolecular H-bonds (2-H=N3-H2, O1-H1), and (d) guanosine after 100 ns (excluded surrounding water molecules).

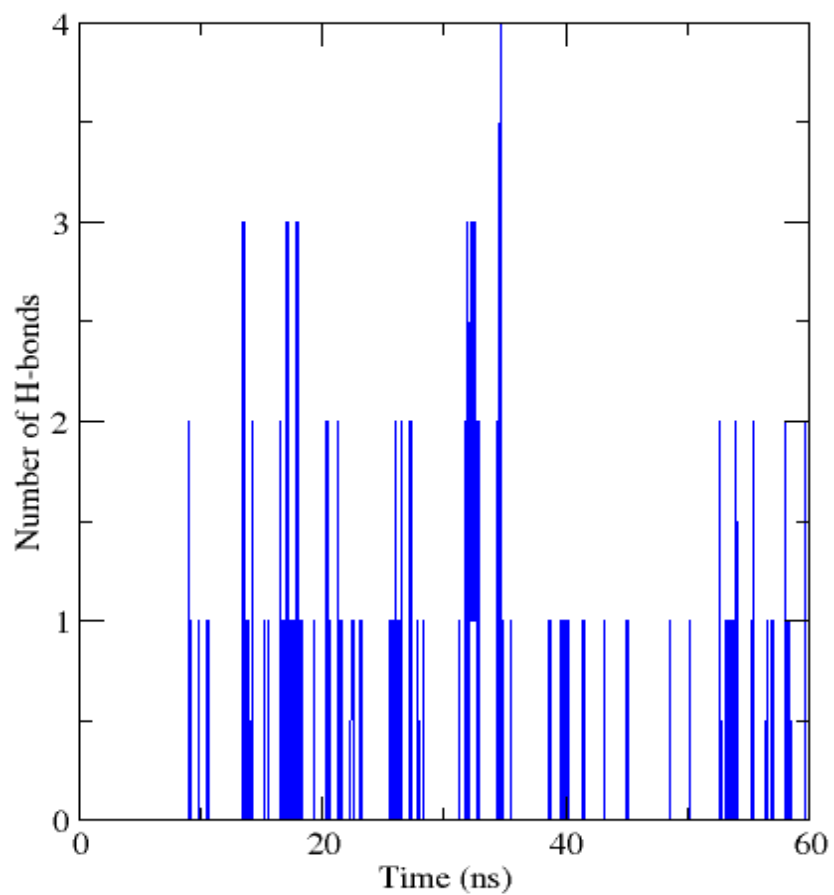

Figure S5: The number of hydrogen bonds (H-bonds) between arginine and guanosine in the MD simulations is up to 60 ns.

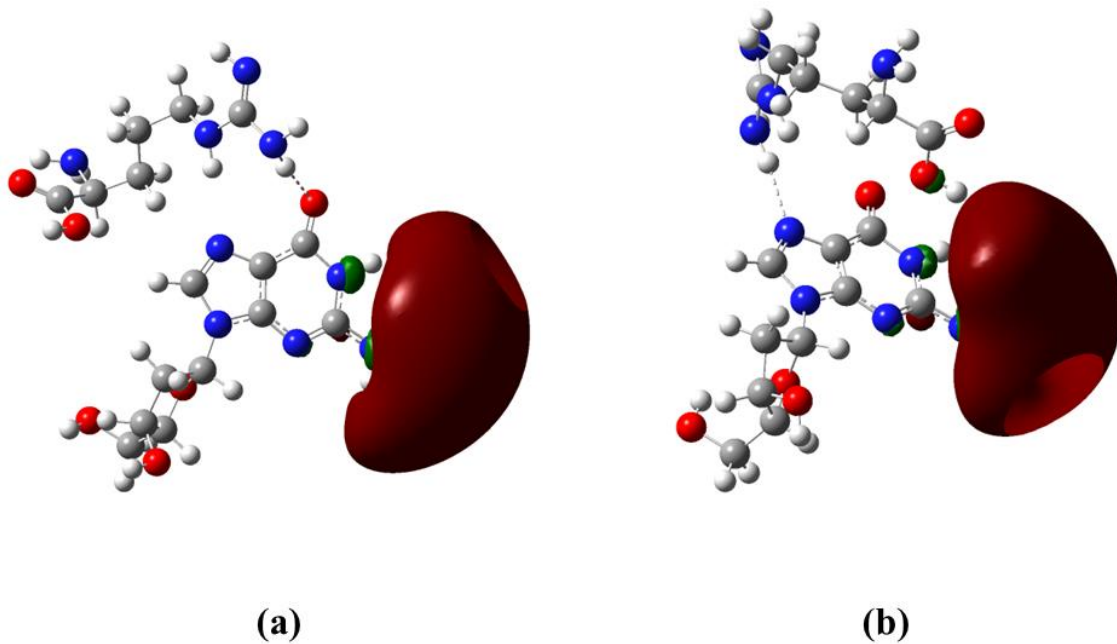

Figure S6: Singly occupied molecular orbitals (SOMOs) of (a) arg-guanosine (1-H=O1-H1) and (b) arg-guanosine (1-H=N3-H1) using MP2//B3LYP/6-311++G(d,p) level of theory.



Table S1: The VAE and VDE values for the molecules were computed using the MP2/6-311++G(d,p) level of theory. (All values are in eV).

| <b>Method</b>                               | <b>MP2/6-311++G(d,p)</b> |            |
|---------------------------------------------|--------------------------|------------|
| <b>QM/MM optimized geometries</b>           | <b>VAE</b>               | <b>VDE</b> |
| <b>arg-guanosine<br/>(1-H=O1-H1)</b>        | -0.26                    | -0.11      |
| <b>arg-guanosine<br/>(1-H=N3-H1)</b>        | -0.27                    | 0.05       |
| <b>arg-guanosine<br/>(2-H=N3-H2, O1-H1)</b> | -1.47                    | 0.98       |
| <b>guanosine</b>                            | -0.41                    | -0.35      |

Table S2: Charge distribution on different fragments of the molecules [from natural population analysis (NPA)] using B3LYP/6-311++G(d,p) level of theory.

| QM/MM Optimization<br>Geometry      | Neutral        |       |          |
|-------------------------------------|----------------|-------|----------|
|                                     | Base (Guanine) | Sugar | Arginine |
| arg-guanosine<br>(1-H=O1-H1)        | -0.24e         | 0.25e | -0.01e   |
| arg-guanosine<br>(1-H=N3-H1)        | -0.25e         | 0.26e | -0.01e   |
| arg-guanosine<br>(2-H=N3-H2, O1-H1) | -0.21e         | 0.23e | -0.02e   |
| guanosine                           | -0.25e         | 0.25e | -        |

Table S3: Vertical detachment energy (eV) with every 50 fs of interval for arg-guanosine (2H = N3-H2, O1-H1), guanosine using MP2/6-311++G(d,p)//B3LYP/6-31G+(d) level of theory.

| <b>Time (in fs)</b> | <b>arg-guanosine (VDE) (in eV)</b> | <b>guanosine (VDE) (in eV)</b> |
|---------------------|------------------------------------|--------------------------------|
| <b>0</b>            | 0.0                                | 0.0                            |
| <b>50</b>           | 0.24                               | -0.33                          |
| <b>100</b>          | 0.62                               | -0.33                          |
| <b>150</b>          | 1.17                               | -0.35                          |
| <b>200</b>          | 1.31                               | -0.33                          |
| <b>250</b>          | 0.98                               | -0.35                          |
| <b>300</b>          | 0.73                               | -0.11                          |
| <b>350</b>          | 0.79                               | -0.33                          |
| <b>400</b>          | 0.98                               | -0.33                          |
| <b>450</b>          | 1.44                               | -0.30                          |
| <b>500</b>          | 1.36                               | -0.35                          |
| <b>550</b>          | 0.90                               | -0.33                          |
| <b>600</b>          | 0.73                               | -0.33                          |
| <b>650</b>          | 0.98                               | -0.33                          |
| <b>700</b>          | 1.31                               | -0.35                          |
| <b>750</b>          | 1.31                               | -0.35                          |
| <b>800</b>          | 0.87                               | -0.33                          |
| <b>850</b>          | 0.79                               | -0.35                          |
| <b>900</b>          | 0.95                               | -0.30                          |
| <b>950</b>          | 1.08                               | -0.33                          |
| <b>1000</b>         | 1.17                               | -0.33                          |

Table S4: Vertical detachment energy (eV) with every 50 fs of interval for arg-guanosine (2H = N3-H2, O1-H1), guanosine using B3LYP/6-311++G(d,p)//B3LYP/6-31G+(d) level of theory.

| <b>Time (in fs)</b> | <b>arg-guanosine (VDE) (in eV)</b> | <b>guanosine (VDE) (in eV)</b> |
|---------------------|------------------------------------|--------------------------------|
| <b>0</b>            | 0.0                                | 0.0                            |
| <b>50</b>           | 1.01                               | 0.22                           |
| <b>100</b>          | 1.33                               | 0.22                           |
| <b>150</b>          | 1.82                               | 0.22                           |
| <b>200</b>          | 1.96                               | 0.24                           |
| <b>250</b>          | 1.69                               | 0.24                           |
| <b>300</b>          | 1.42                               | 0.27                           |
| <b>350</b>          | 1.47                               | 0.24                           |
| <b>400</b>          | 1.69                               | 0.24                           |
| <b>450</b>          | 2.06                               | 0.24                           |
| <b>500</b>          | 2.01                               | 0.27                           |
| <b>550</b>          | 1.55                               | 0.27                           |
| <b>600</b>          | 1.44                               | 0.26                           |
| <b>650</b>          | 1.66                               | 0.26                           |
| <b>700</b>          | 1.96                               | 0.24                           |
| <b>750</b>          | 1.93                               | 0.25                           |
| <b>800</b>          | 1.55                               | 0.24                           |
| <b>850</b>          | 1.50                               | 0.27                           |
| <b>900</b>          | 1.60                               | 0.27                           |
| <b>950</b>          | 1.47                               | 0.27                           |
| <b>1000</b>         | 1.85                               | 0.24                           |

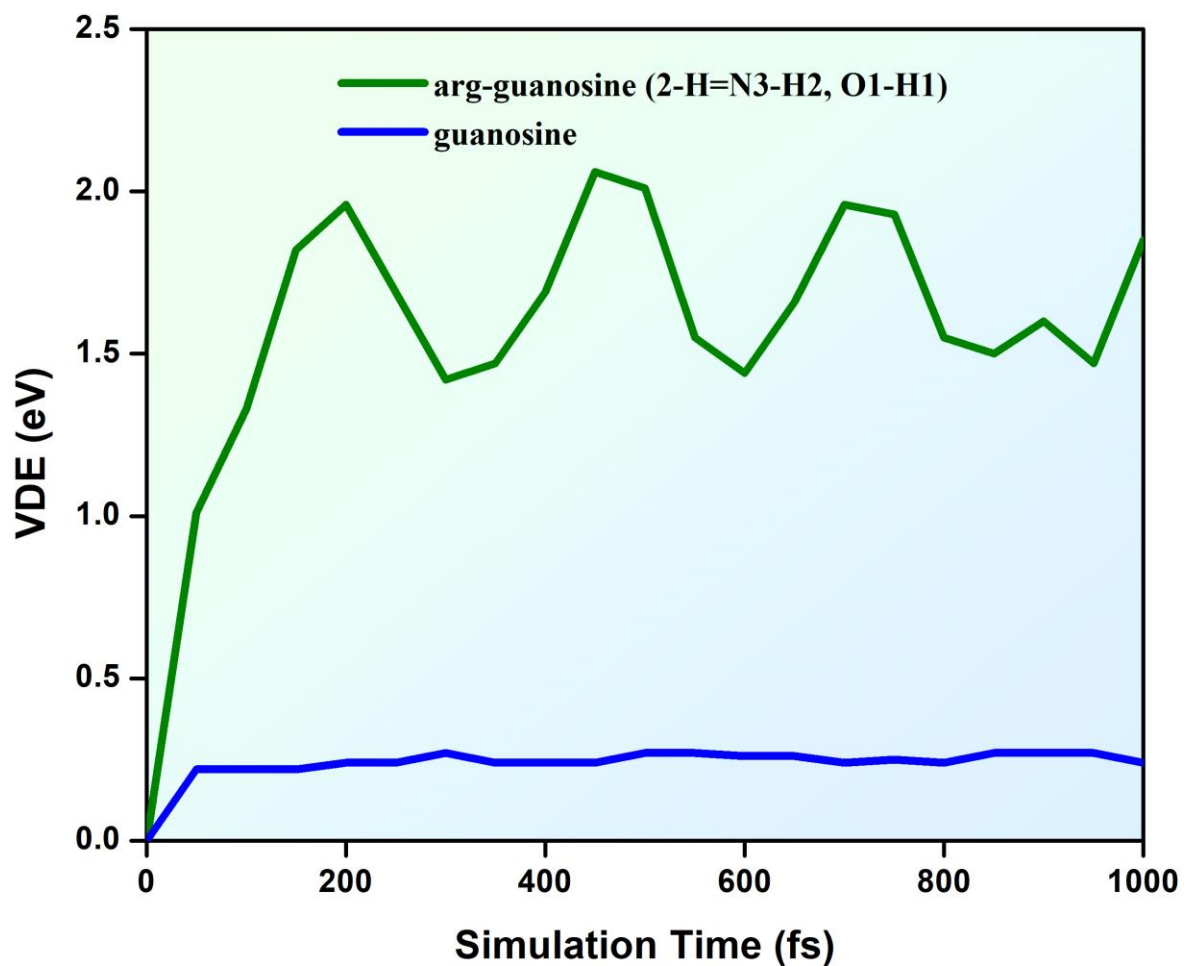

Figure S7: Vertical detachment energy (eV) vs. time (fs) (a) for arg-guanosine (2H = N3-H2, O1-H1), (b) guanosine using B3LYP/6-311++G(d,p)//B3LYP/6-31G+(d) level of theory.

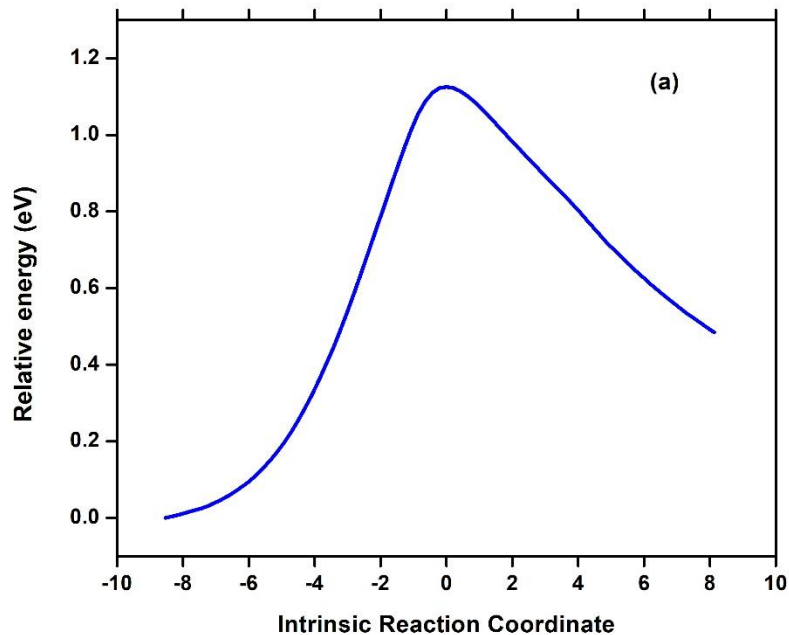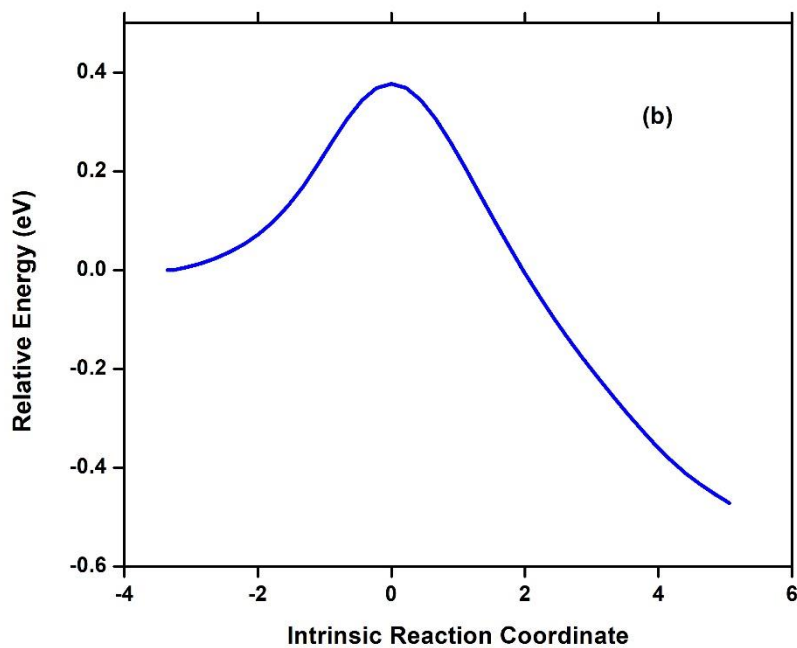

Figure S8: The intrinsic reaction coordinate (IRC) curves (a) guanosine and (b) arg-guanosine ( $2H = N3-H2, O1-H1$ ) using B3LYP/6-311++G(d,p) level of theory for high layer and UFF for low layer surrounding water.
